# Supplementary material
Source: PubMed Central journal article supplement (PMC7930807)
Supplement: mmc1.pdf [file mmc1.pdf]

# Pulmonary Function and Radiologic Features in Survivors of Critical COVID-19

## A 3-Month Prospective Cohort

*Jessica González, MD; Iván D. Benítez, MSc; Paola Carmona, BN; Sally Santistevé, BN; Aida Monge, BPhysio; Anna Moncusí-Moix, MSc; Clara Gort-Paniello, MSc; Lucía Pinilla, MSc; Amara Carratalá, Techn; María Zuñil, MD; Ricard Ferrer, MD; Adrián Ceccato, MD; Laia Fernández, MD; Ana Motos, PhD; Jordi Riera, MD; Rosario Menéndez, MD; Dario Garcia-Gasulla, MD; Oscar Peñuelas, MD; Jesús F. Bermejo-Martin, MD; Gonzalo Labarca, MD; Jesus Caballero, MD; Gerard Torres, MD; David de Gonzalo-Calvo, PhD; Antoni Torres, MD; and Ferran Barbé, MD; on behalf of the CIBERESUCICOVID Project (COV20/00110, ISCIII)*

CHEST 2021; 160(1):187-198

*Online supplements are not copyedited prior to posting and the author(s) take full responsibility for the accuracy of all data.*

© 2021 AMERICAN COLLEGE OF CHEST PHYSICIANS. Reproduction of this article is prohibited without written permission from the American College of Chest Physicians. See online for more details. DOI: 10.1016/j.chest.2021.02.062

**e-Table 1.** Differences in distance on the 6MWT between the study population and the reference values of a healthy population.

|                                                         | N=60<br>median [IQR]     |
|---------------------------------------------------------|--------------------------|
| Distance (meters) in the study population               | 400 [360;430]            |
| Distance (meters) in the healthy population (reference) | 550 [477;581]            |
| Difference (meters) between the groups                  | -128.43 [-185.03;-62.66] |

**e-Table 2.** Differences in pulmonary function between tertiles of TSS severity.

| Pulmonary function             | CT score                                         |                                                   |                                                  | p value |
|--------------------------------|--------------------------------------------------|---------------------------------------------------|--------------------------------------------------|---------|
|                                | First tertile<br>(n = 23)<br><i>mean (95%CI)</i> | Second tertile<br>(n = 20)<br><i>mean (95%CI)</i> | Third tertile<br>(n = 14)<br><i>mean (95%CI)</i> |         |
| FVC-%                          | 87.9 (81.9;93.8)                                 | 79.1 (71.6;86.6)                                  | 73.6 (63.2;84.0)                                 | 0.026   |
| FEV1-%                         | 96.3 (89.4;103)                                  | 86.4 (78.3;94.5)                                  | 79.1 (67.1;91.0)                                 | 0.017   |
| FEV1/FVC                       | 82.2 (80.1;84.2)                                 | 81.1 (78.6;83.5)                                  | 80.8 (78.0;83.6)                                 | 0.658   |
| TLC-%                          | 89.8 (83.5;96.1)                                 | 82.8 (76.4;89.2)                                  | 76.7 (64.4;88.9)                                 | 0.060   |
| ≥80%, N <sup>o</sup> (%)       | 0 (0.00%)                                        | 0 (0.00%)                                         | 1 (7.14%)                                        | 0.099   |
| ≤50-80%, N <sup>o</sup> (%)    | 5 (21.7%)                                        | 8 (40.0%)                                         | 7 (50.0%)                                        |         |
| <50%, N <sup>o</sup> (%)       | 18 (78.3%)                                       | 12 (60.0%)                                        | 6 (42.9%)                                        |         |
| RV-%                           | 97.3 (81.3;113)                                  | 91.5 (74.1;109)                                   | 75.7 (50.3;101)                                  | 0.261   |
| DLCO-mL/min/mmHg,<br>Mean (SD) | 74.2 (69.8;78.6)                                 | 65.6 (60.1;71.0)                                  | 57.8 (51.7;63.8)                                 | <0.001  |
| ≥80%, N <sup>o</sup> (%)       | 8 (34.8%)                                        | 2 (10.0%)                                         | 0 (0.00%)                                        | 0.005   |
| ≤60-80%, N <sup>o</sup> (%)    | 13 (56.5%)                                       | 12 (60.0%)                                        | 6 (42.9%)                                        |         |
| <60%, N <sup>o</sup> (%)       | 2 (8.70%)                                        | 6 (30.0%)                                         | 8 (57.1%)                                        |         |
| <b>6MWT</b>                    |                                                  |                                                   |                                                  |         |
| Distance, meters               | 432 (398;466)                                    | 373 (332;415)                                     | 412 (342;481)                                    | 0.124   |
| Oxygen saturation <sup>§</sup> |                                                  |                                                   |                                                  |         |
| Mean (SD)                      | 97.0 (95.0;97.0)                                 | 96.0 (95.0;96.0)                                  | 95.0 (94.0;96.0)                                 | 0.028   |
| Initial (SD)                   | 97.0 (96.0;97.0)                                 | 96.0 (96.0;97.0)                                  | 97.0 (95.0;98.0)                                 | 0.552   |
| Final (SD)                     | 96.0 (96.0;97.0)                                 | 96.0 (95.0;96.0)                                  | 95.0 (94.0;96.0)                                 | 0.045   |
| Minimum (SD)                   | 96.0 (94.0;97.0)                                 | 94.5 (93.0;96.0)                                  | 94.0 (92.0;95.0)                                 | 0.019   |
| Minimum minus<br>initial       | -1.00<br>(-3.00;0.00)                            | -2.00<br>(-3.00;-1.00)                            | -3.00<br>(-5.00;-2.00)                           | 0.011   |

<sup>§</sup>Non-parametric tests were performed for the 6MWT oxygen saturation parameters due to non-normality distribution. Abbreviations: FVC=forced vital capacity; FEV<sub>1</sub>=forced expiratory volume in the first second; TLC=total lung capacity; RV=residual volume; DLCO=diffusing capacity for carbon monoxide; 6MWT=six-minute walking test.

Number of chest CT missing: 5

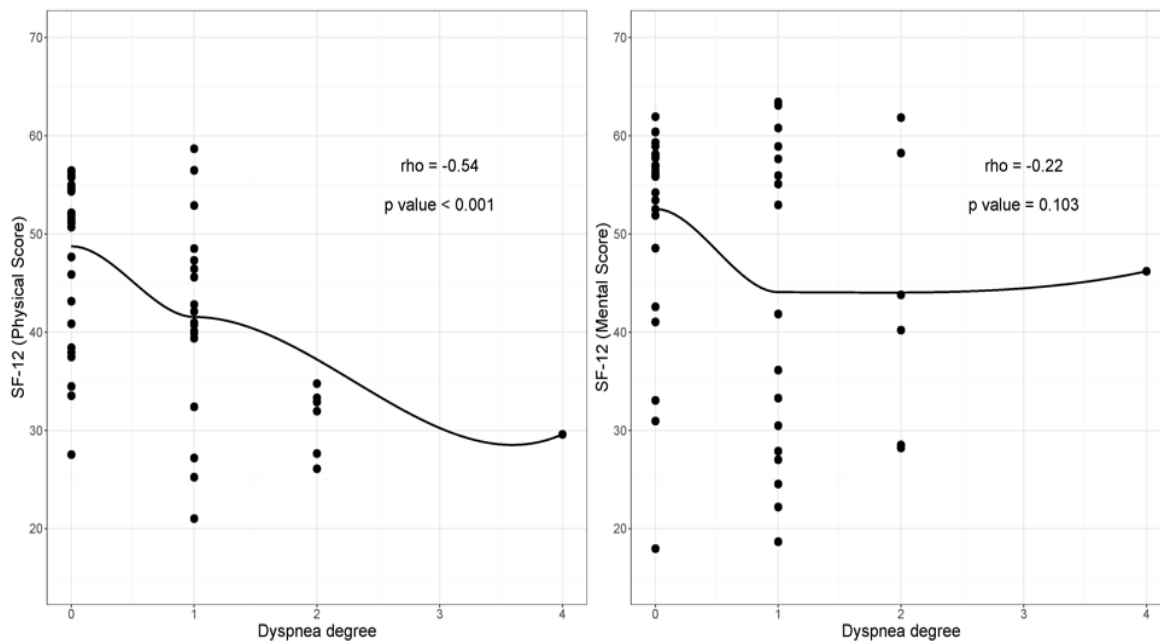

**e-Figure 1.** Correlation between degree of dyspnea and the components of the SF-12 questionnaire. P values was computed from the Spearman rank correlation coefficient.

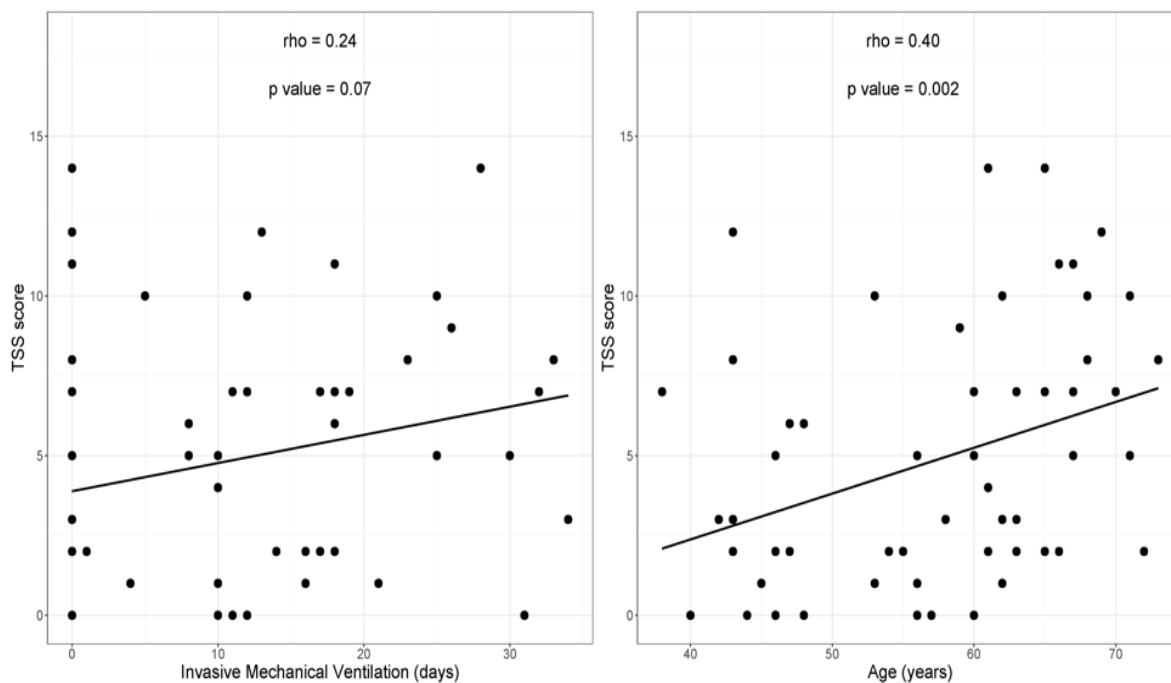

**e-Figure 2.** Prognostic factors for ICU admission in patients with worse TSS at the 3-month follow-up than at discharge. P values was computed from the Spearman rank correlation coefficient.

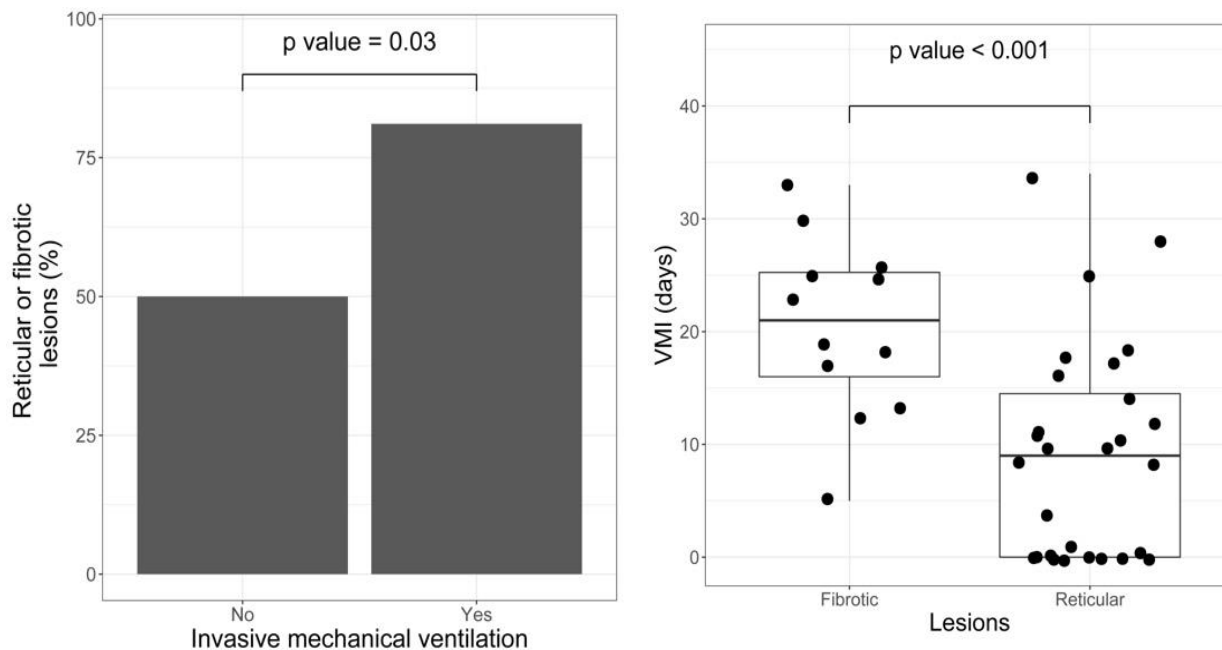

**e-Figure 3. (A)** ICU characteristic that was a predictor of pulmonary lesions (reticular or fibrotic) at the 3-month follow-up at discharge. **(B)** ICU characteristic that could be used to determine the type of pulmonary lesion (fibrotic or reticular) at the 3-month follow-up after discharge. P values were computed using  $\chi^2$  and Mann-Whitney U tests.

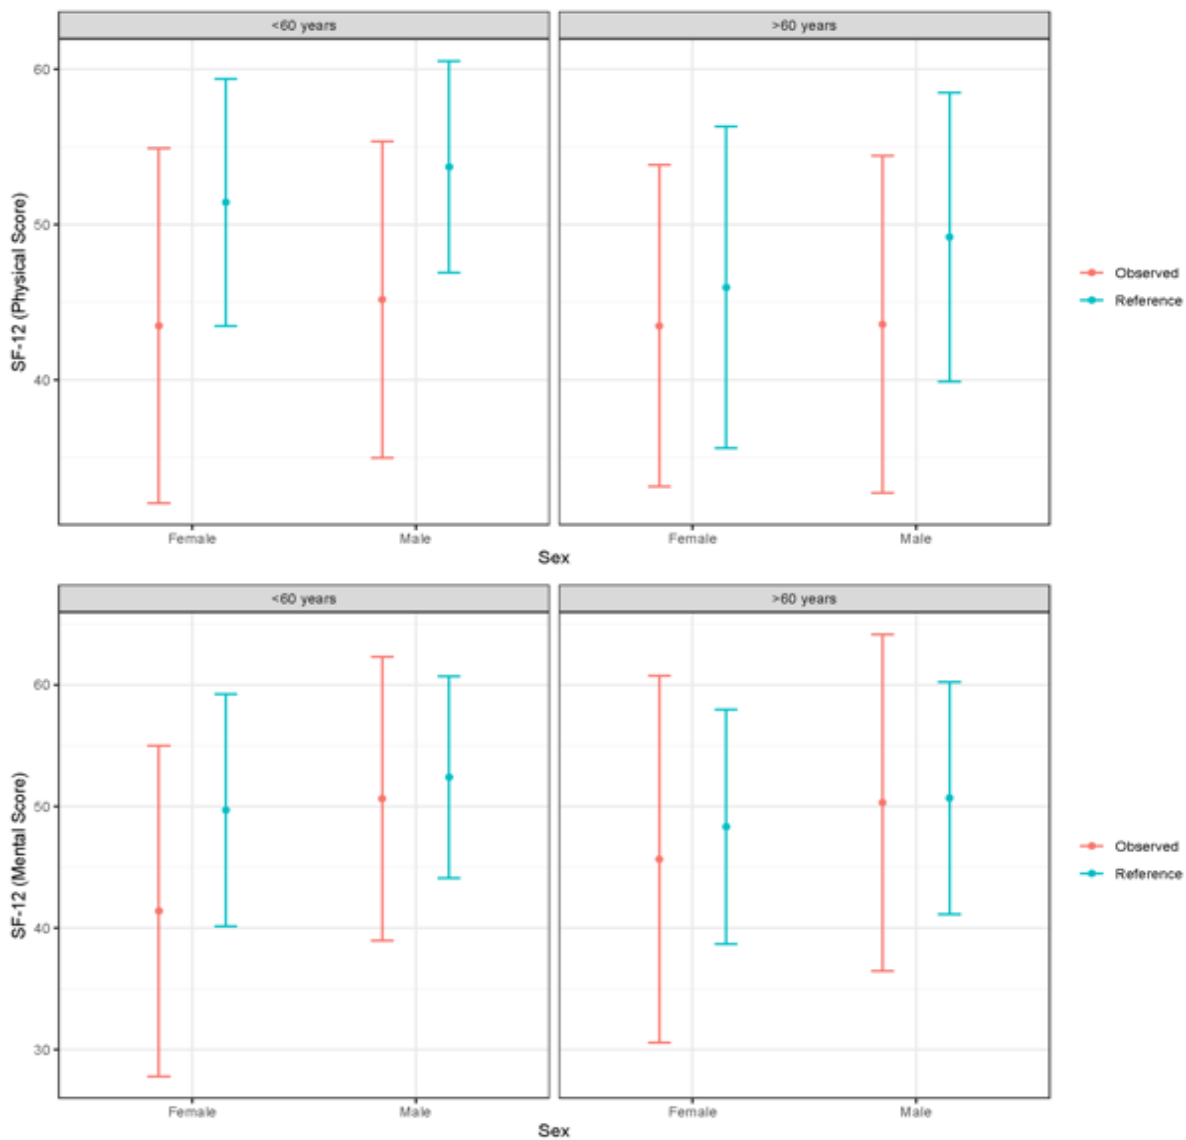

**e-Figure 4.** Distribution measures (means and standard deviations) of the SF-12 scores of the study patients (observed) and a reference healthy population (reference) according to age category and sex.
